# Supplementary material for: Facile fabrication of lipase to amine functionalized gold nanoparticles to enhance stability and activity
Source: Royal Society of Chemistry journal article supplement (doi:10.1039/c7ra06075k), 2017-01-01
Supplement: c7ra06075k1.pdf [file c7ra06075k1.pdf]

## Supplementary Information

### Facile Fabrication of Lipase to Amine Functionalized Gold Nanoparticles to Enhance Stability and Activity

Sristy Shikha<sup>a</sup>, Krishan Gopal Thakur<sup>b</sup>, Mani Shankar Bhattacharyya<sup>a\*</sup>

<sup>a</sup>Fermentation Science and Biocatalysis Laboratory, CSIR-Institute of Microbial Technology,  
Sector 39 A, Chandigarh- 160036, India.

<sup>b</sup>Structural Biology Laboratory, G. N. Ramachandran Protein Centre, CSIR-Institute of Microbial  
Technology, Chandigarh 160036, India

\*Corresponding author: Mani Shankar Bhattacharyya

Tel.: +911726665313 Fax: +911722695215, E-Mail: [manisb@imtech.res.in](mailto:manisb@imtech.res.in)

## Supplementary Results

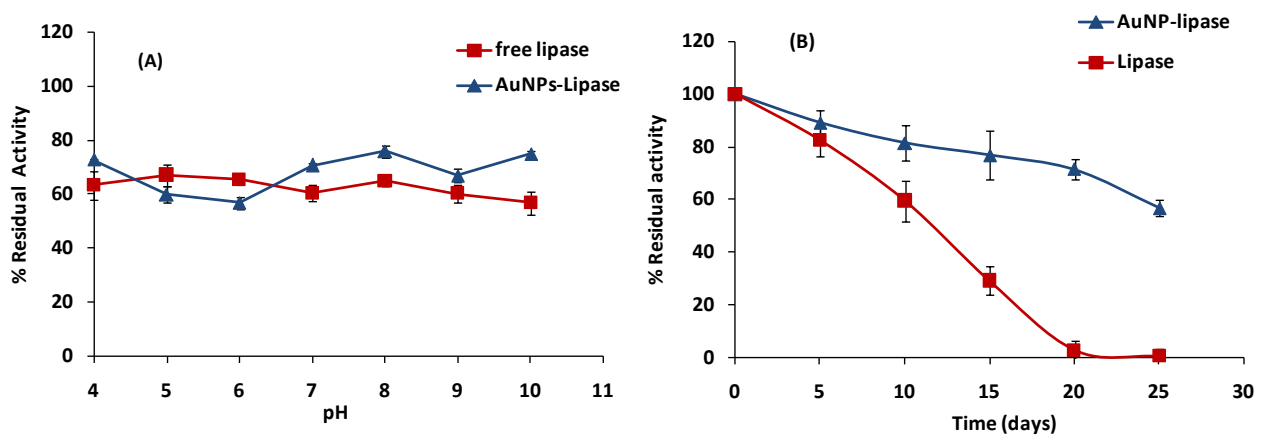

**Supplementary Figure 1.** Effect of pH on activity of free and conjugated lipase (A). Comparison of storage stabilities of the free and conjugated lipase (B). Experiments were performed in triplicate and error bars indicate the standard deviation.

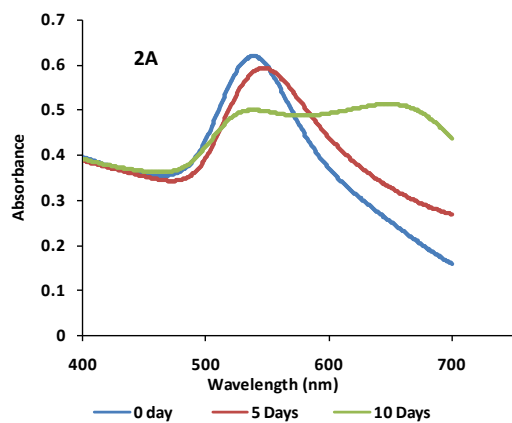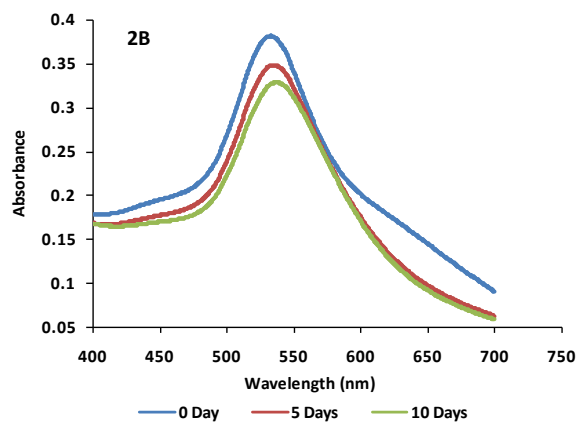

**Supplementary Figure 2.** UV spectra of unconjugated (2A) and conjugated (2B) amine functionalized gold nanoparticles to understand the storage stability.
